# Supplementary material for: Improving Preparedness for Mass Casualty Incidents in Hospitals: Insights from a Large-Scale Simulation Exercise with Geotracking and Validated Questionnaires
Source: Research Square preprint supplement (doi:10.21203/rs.3.rs-7859560/v1), 2025-10-22
Supplement: Supplementary file 1 [file 828b72e69e40ee1d0625d108.docx]

**Supplemental Table 1:**

| **NASA Task Load Index** | |  |  |  |  |
| --- | --- | --- | --- | --- | --- |
|  |  |  |  |  |  |
| **Mental Demand** | |  | *mean* | *SD* | *response rate [%]* |
|  | All participants |  | 11.9 | 4.4 | 99.0 |
|  | Medical staff |  | 12.6 | 3.4 | 100.0 |
|  | Resident |  | 12.7 | 3.3 | 100.0 |
|  | Specialist |  | 12.5 | 3.6 | 100.0 |
|  | Nursing staff incl. trainees | | 11.5 | 5.0 | 97.9 |
|  | Nursing staff |  | 11.5 | 5.1 | 97.6 |
|  | Nursing trainees |  | 11.3 | 3.8 | 100.0 |
| *Mann-Whitney test* | |  | *Median* | *P* |  |
|  | Medical staff vs. nursing staff (incl. trainees) |  | 13 vs. 12 | 0.3979 | ns |
|  | Resident vs. specialist |  | 13 vs. 13 | 0.7938 | ns |
|  | Nursing staff vs. trainees |  | 12 vs. 12 | 0.8182 | ns |
|  | Female vs. male |  | 13 vs. 12.5 | 0.7697 | ns |
|  | Young vs. old |  | 12.5 vs. 13 | 0.5972 | ns |
|  | Professional experience (<Median vs. >Median) |  | 13 vs. 12.5 | 0.9256 | ns |
| **Physical Demand** | |  | *mean* | *SD* | *response rate [%]* |
|  | All participants |  | 9.2 | 4.5 | 99.0 |
|  | Medical staff |  | 8.7 | 4.1 | 100.0 |
|  | Resident |  | 9.1 | 4.0 | 100.0 |
|  | Specialist |  | 8.1 | 4.2 | 100.0 |
|  | Nursing staff incl. trainees | | 10.2 | 4.8 | 97.6 |
|  | Nursing staff |  | 9.9 | 4.8 | 97.6 |
|  | Nursing trainees |  | 12.5 | 4.3 | 100.0 |
| *Mann-Whitney test* | |  | *Median* | *P* |  |
|  | Medical staff vs. nursing staff (incl. trainees) |  | 9.5 vs. 11 | 0.0867 | ns |
|  | Resident vs. specialist |  | 10 vs. 9 | 0.4333 | ns |
|  | Nursing staff vs. trainees |  | 10.5 vs. 13.5 | 0.1916 | ns |
|  | Female vs. male |  | 11 vs. 9 | 0.0832 | ns |
|  | Young vs. old |  | 10.5 vs. 9 | 0.0299 | * |
|  | Professional experience (<Median vs. >Median) |  | 11 vs. 9.5 | 0.0420 | * |
| **Temporal Demand** | |  | *mean* | *SD* | *response rate [%]* |
|  | All participants |  | 13.0 | 4.1 | 99.0 |
|  | Medical staff |  | 13.6 | 3.2 | 100.0 |
|  | Resident |  | 14.1 | 2.7 | 100.0 |
|  | Specialist |  | 12.7 | 3.7 | 100.0 |
|  | Nursing staff incl. trainees | | 13.0 | 4.5 | 97.9 |
|  | Nursing staff |  | 12.9 | 4.7 | 97.6 |
|  | Nursing trainees |  | 14.2 | 2.7 | 100.0 |
| *Mann-Whitney test* | |  | *Median* | *P* |  |
|  | Medical staff vs. nursing staff (incl. trainees) |  | 14.5 vs. 13.5 | 0.6861 | ns |
|  | Resident vs. specialist |  | 15 vs. 13 | 0.1402 | ns |
|  | Nursing staff vs. trainees |  | 13 vs. 14 | 0.6478 | ns |
|  | Female vs. male |  | 14 vs. 13.5 | 0.5405 | ns |
|  | Young vs. old |  | 15 vs. 13 | 0.2499 | ns |
|  | Professional experience (<Median vs. >Median) |  | 14 vs. 13 | 0.1968 | ns |
| **Performance** | |  | *mean* | *SD* | *response rate [%]* |
|  | All participants |  | 13.9 | 4.2 | 99.0 |
|  | Medical staff |  | 14.4 | 4.3 | 100.0 |
|  | Resident |  | 14.1 | 4.7 | 100.0 |
|  | Specialist |  | 14.8 | 3.6 | 100.0 |
|  | Nursing staff incl. trainees | | 13.8 | 4.1 | 97.9 |
|  | Nursing staff |  | 13.7 | 4.2 | 97.6 |
|  | Nursing trainees |  | 14.5 | 2.5 | 100.0 |
| *Mann-Whitney test* | |  | *Median* | *P* |  |
|  | Medical staff vs. nursing staff (incl. trainees) |  | 15 vs. 15 | 0.5156 | ns |
|  | Resident vs. specialist |  | 15 vs. 15 | 0.7694 | ns |
|  | Nursing staff vs. trainees |  | 15 vs. 14.5 | 0.9030 | ns |
|  | Female vs. male |  | 15 vs. 15 | 0.9399 | ns |
|  | Young vs. old |  | 15 vs. 15 | 0.5849 | ns |
|  | Professional experience (<Median vs. >Median) |  | 15 vs. 15 | 0.6017 | ns |
| **Effort** | |  | *mean* | *SD* | *response rate [%]* |
|  | All participants |  | 11.5 | 3.9 | 99.0 |
|  | Medical staff |  | 12.4 | 3.3 | 100.0 |
|  | Resident |  | 13.3 | 3.0 | 100.0 |
|  | Specialist |  | 11.2 | 3.2 | 100.0 |
|  | Nursing staff incl. trainees | | 10.8 | 3.9 | 97.9 |
|  | Nursing staff |  | 10.7 | 3.8 | 97.6 |
|  | Nursing trainees |  | 11.2 | 4.6 | 100.0 |
| *Mann-Whitney test* | |  | *Median* | *P* |  |
|  | Medical staff vs. nursing staff (incl. trainees) |  | 13 vs. 11 | 0.0322 | * |
|  | Resident vs. specialist |  | 14 vs. 12 | 0.0134 | * |
|  | Nursing staff vs. trainees |  | 11 vs. 11.5 | 0.7548 | ns |
|  | Female vs. male |  | 12 vs. 12 | 0.9009 | ns |
|  | Young vs. old |  | 13.5 vs. 11 | 0.1462 | ns |
|  | Professional experience (<Median vs. >Median) |  | 13 vs. 11 | 0.034 | * |
| **Frustration** | |  | *mean* | *SD* | *response rate [%]* |
|  | All participants |  | 7.2 | 4.8 | 99.0 |
|  | Medical staff |  | 6.5 | 4.5 | 100.0 |
|  | Resident |  | 7.9 | 4.8 | 100.0 |
|  | Specialist |  | 4.5 | 3.3 | 100.0 |
|  | Nursing staff incl. trainees | | 7.9 | 4.9 | 97.9 |
|  | Nursing staff |  | 7.4 | 4.8 | 97.6 |
|  | Nursing trainees |  | 11.5 | 4.0 | 100.0 |
| *Mann-Whitney test* | |  | *Median* | *P* |  |
|  | Medical staff vs. nursing staff (incl. trainees) |  | 5 vs.7 | 0.1432 | ns |
|  | Resident vs. specialist |  | 7 vs. 4 | 0.0267 | * |
|  | Nursing staff vs. trainees |  | 6 vs. 11.5 | 0.0511 | ns |
|  | Female vs. male |  | 7 vs. 5 | 0.1416 | ns |
|  | Young vs. old |  | 8.5 vs. 4 | 0.0005 | *** |
|  | Professional experience (<Median vs. >Median) |  | 8 vs. 4.5 | 0.0025 | ** |
