# Supplementary material for: Improving Preparedness for Mass Casualty Incidents in Hospitals: Insights from a Large-Scale Simulation Exercise with Geotracking and Validated Questionnaires
Source: Research Square preprint supplement (doi:10.21203/rs.3.rs-7859560/v1), 2025-10-22
Supplement: Supplementary file 2 [file fd9fded61ea66f79f8c9d105.docx]

**Supplemental Table 2: Results of TEAM Questionnaire**

| **Team Emergency Assessment Measure** | |  |  |  |  |
| --- | --- | --- | --- | --- | --- |
|  |  |  |  |  |  |
| **Leadership** | |  | *mean* | *SD* | *response rate [%]* |
|  | The team leader led the team know what was expected of them through direction and command. | All participants | 2.8 | 1.3 | 93.0 |
|  | Medical staff | 2.9 | 1.1 | 97.8 |
|  | Nursing staff | 2.6 | 1.4 | 85.4 |
|  | Nursing trainees | 2.7 | 1.1 | 100.0 |
|  | The team leader maintained a global perspective. | All participants | 2.8 | 1.2 | 92.0 |
|  | Medical staff | 2.9 | 0.9 | 95.7 |
|  | Nursing staff | 2.6 | 1.4 | 85.4 |
|  | Nursing trainees | 2.8 | 0.9 | 100.0 |
| **Teamwork** | |  | *mean* | *SD* | *response rate [%]* |
|  | The team communicated effectively. | All participants | 3.2 | 0.8 | 92.0 |
|  | Medical staff | 3.3 | 0.7 | 93.5 |
|  | Nursing staff | 3.3 | 0.7 | 87.8 |
|  | Nursing trainees | 2.3 | 0.7 | 100.0 |
|  | The team worked together to complete the tasks in a timely manner. | All participants | 3.5 | 0.7 | 93.0 |
|  | Medical staff | 3.5 | 0.7 | 95.7 |
|  | Nursing staff | 3.6 | 0.6 | 87.8 |
|  | Nursing trainees | 3.5 | 0.5 | 100.0 |
|  | The team acted with composure and control. | All participants | 3.4 | 0.8 | 93.0 |
|  | Medical staff | 3.6 | 0.7 | 95.7 |
|  | Nursing staff | 3.3 | 0.8 | 87.8 |
|  | Nursing trainees | 3.0 | 0.6 | 100.0 |
|  | The team morale was positive. | All participants | 3.6 | 0.7 | 93.0 |
|  | Medical staff | 3.5 | 0.7 | 95.7 |
|  | Nursing staff | 3.6 | 0.6 | 87.8 |
|  | Nursing trainees | 3.7 | 0.5 | 100.0 |
|  | The team adapted to changing situations. | All participants | 3.3 | 0.8 | 93.0 |
|  | Medical staff | 3.4 | 0.7 | 95.7 |
|  | Nursing staff | 3.3 | 0.9 | 87.8 |
|  | Nursing trainees | 3.0 | 0.0 | 100.0 |
|  | The team monitored and reassessed the situation. | All participants | 3.1 | 1.0 | 93.0 |
|  | Medical staff | 3.2 | 0.8 | 95.7 |
|  | Nursing staff | 3.1 | 1.1 | 87.8 |
|  | Nursing trainees | 2.7 | 0.7 | 100.0 |
|  | The team anticipated potential actions. | All participants | 3.0 | 1.0 | 93.0 |
|  | Medical staff | 3.0 | 1.0 | 95.7 |
|  | Nursing staff | 3.0 | 1.0 | 87.8 |
|  | Nursing trainees | 3.0 | 0.0 | 100.0 |
| **Task mangement** | |  | *mean* | *SD* | *response rate [%]* |
|  | The team prioritized tasks. | All participants | 3.3 | 0.8 | 93.0 |
|  | Medical staff | 3.2 | 0.8 | 95.7 |
|  | Nursing staff | 3.4 | 0.6 | 87.8 |
|  | Nursing trainees | 2.7 | 0.9 | 100.0 |
|  | The team followed approved standards/guidelines. | All participants | 3.1 | 0.8 | 90.0 |
|  | Medical staff | 3.2 | 0.8 | 95.7 |
|  | Nursing staff | 3.1 | 0.7 | 82.9 |
|  | Nursing trainees | 2.6 | 0.8 | 83.3 |
| **Overall** | |  | *mean* | *SD* | *response rate [%]* |
|  | On a scale of 1-10, give your global rating of the teams' performance | All participants | 7.6 | 1.7 | 93.0 |
|  | Medical staff | 7.8 | 1.7 | 95.7 |
|  | Nursing staff | 7.5 | 1.4 | 87.8 |
|  | Nursing trainees | 7.7 | 0.7 | 100.0 |
